# Supplementary material for: A mixed-valence metallogrid [CoIII2CoII2] with an unusual electronic structure and single-ion-magnet characterization
Source: Royal Society of Chemistry journal article supplement (doi:10.1039/c7dt00564d), 2017-01-01
Supplement: c7dt00564d1.pdf [file c7dt00564d1.pdf]

*Supporting information for*

**Mixed-Valence Metallogrid [Co<sup>III</sup><sub>2</sub>Co<sup>II</sup><sub>2</sub>] with Unusual  
Electronic Structure and Single-Ion-Magnet  
Characterization**

Wei Huang,<sup>a</sup> Feifei Pan,<sup>a</sup> Zhenxing Wang,<sup>b</sup> Yan Bai,<sup>c</sup> Xuejun Feng,<sup>\*a</sup>

Jiande Gu,<sup>a</sup> Zhong-Wen Ouyang<sup>b</sup> and Dayu Wu<sup>\*a</sup>

<sup>a</sup> Key Laboratory of Advanced Catalytic Materials and Technology, Collaborative Innovation Center of Advanced Catalysis & Green Manufacturing, School of Petrochemical Engineering, Changzhou University, 213164, China

<sup>b</sup> Wuhan National High Magnetic Field Center, Huazhong University of Science and Technology, 430074 Wuhan, China

<sup>c</sup> Key Laboratory of Polyoxometalate Chemistry of Henan Province, School of Chemistry and Chemical Engineering, Henan University, Kaifeng, 475004, People's Republic of China.

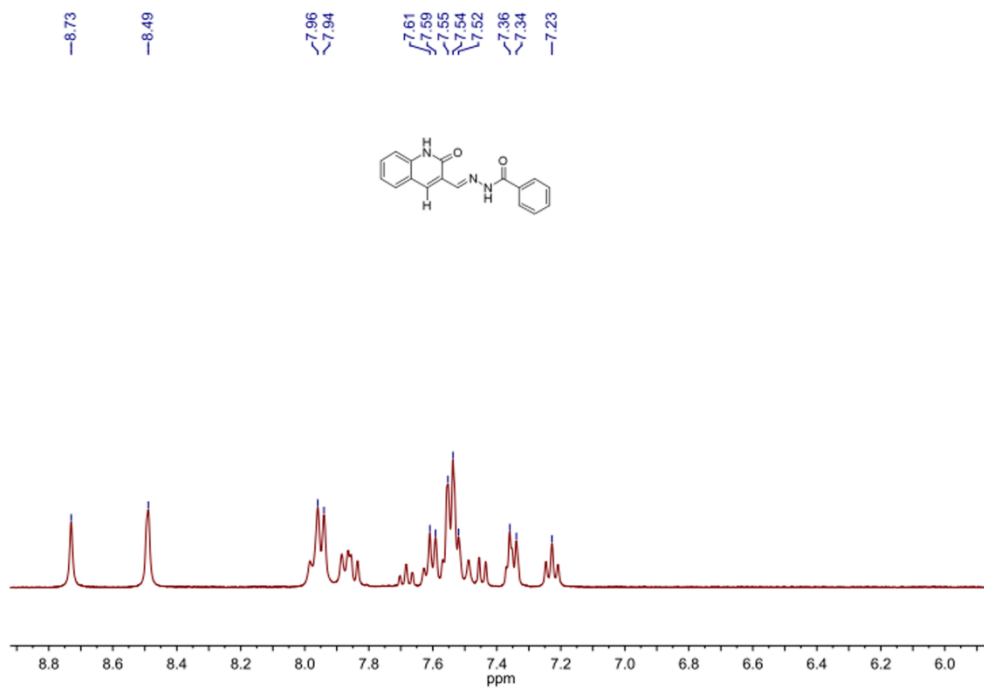

**Figure S1.** The <sup>1</sup>H NMR spectra of ligand L in DMSO-*d*<sub>6</sub>.

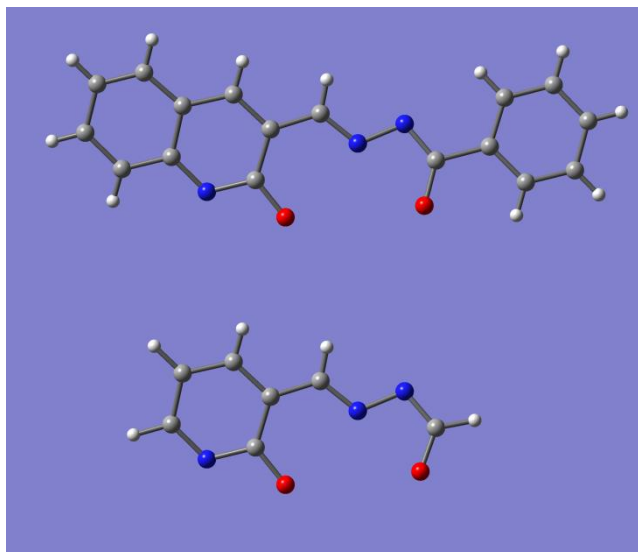

**Figure S2.** Ligand L and the simplified L. Color legend: red for O, grey for C, blue for N, and white for H.

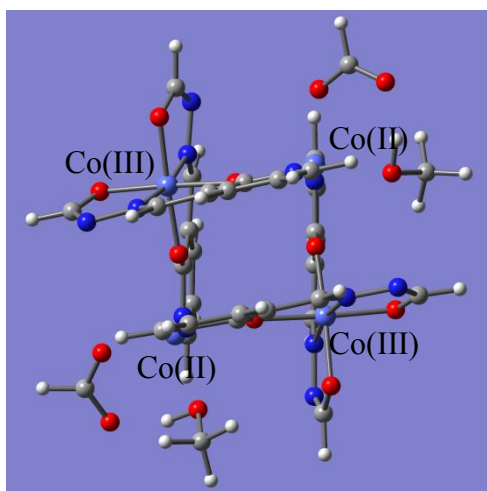

**Figure S3.** The optimized structure of the model. Color legend: light blue for Co, others see Fig. S3.

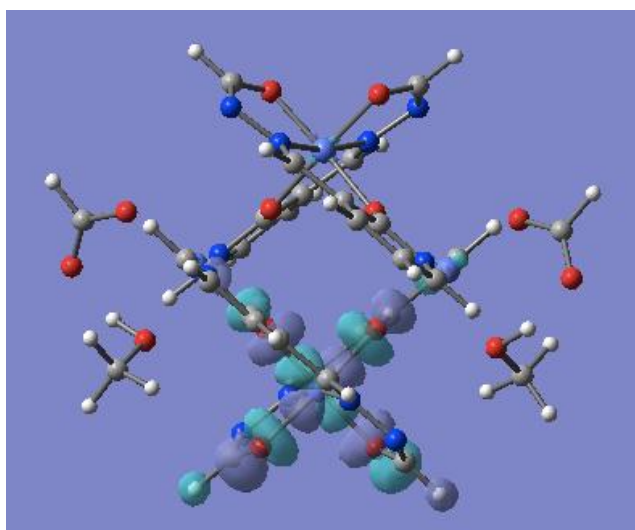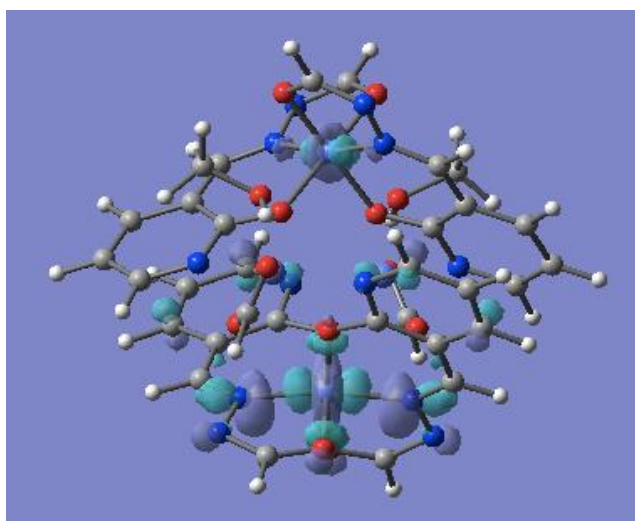

**Figure S4.** The unoccupied  $dx^2-y^2$  (top) and  $dz^2$  (below) MO of Co(III).

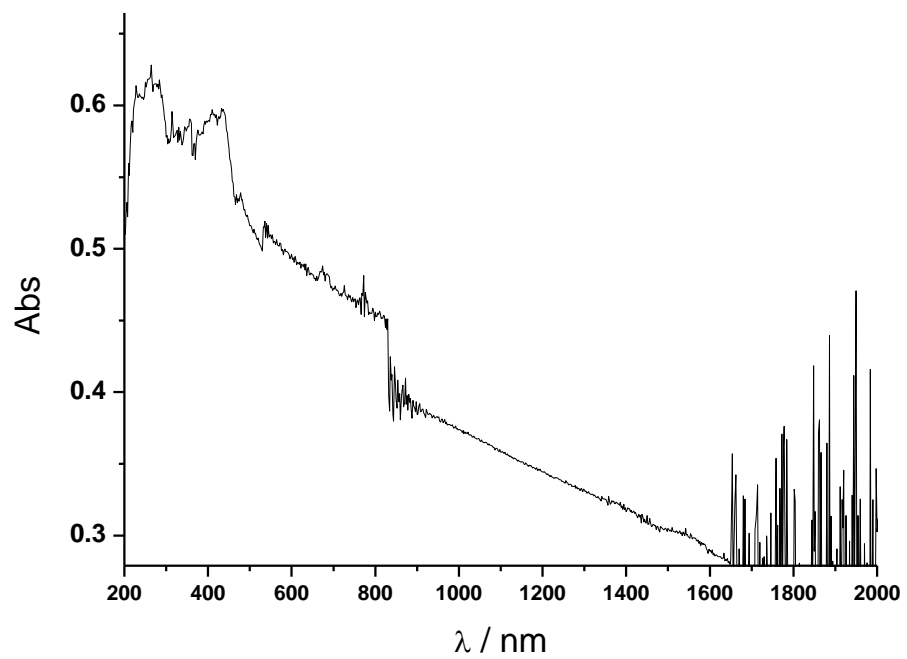

**Figure S5.** The UV-vis-NIR spectra of compound **1** in solid state.

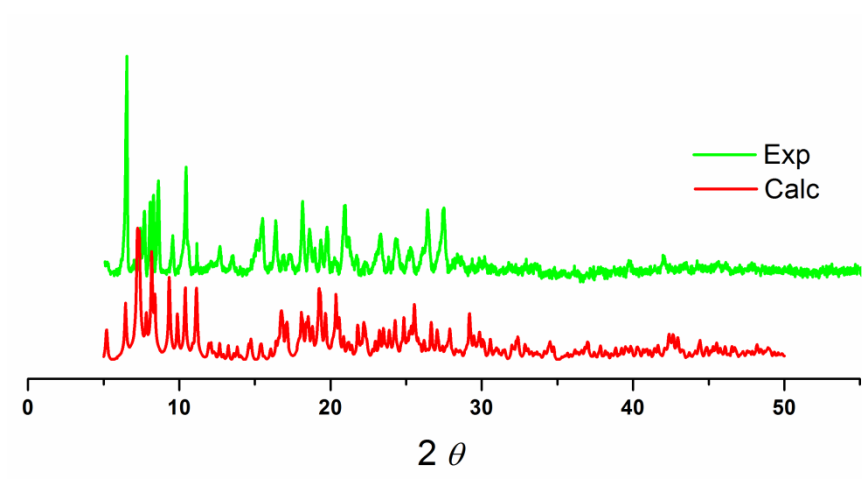

**Figure S6.** The experimental and calculated powder X-ray diffraction pattern of **1**.

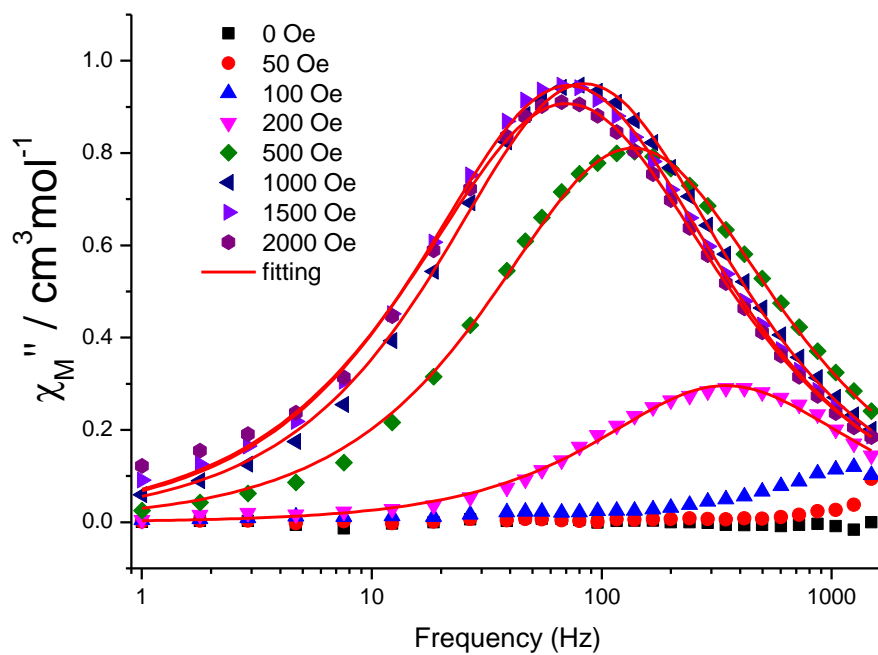

**Figure S7.** Frequency dependence of out-of-phase ac signal at different applied *dc* fields of **1**. The red lines are the best fit according to the generalized Debye model.



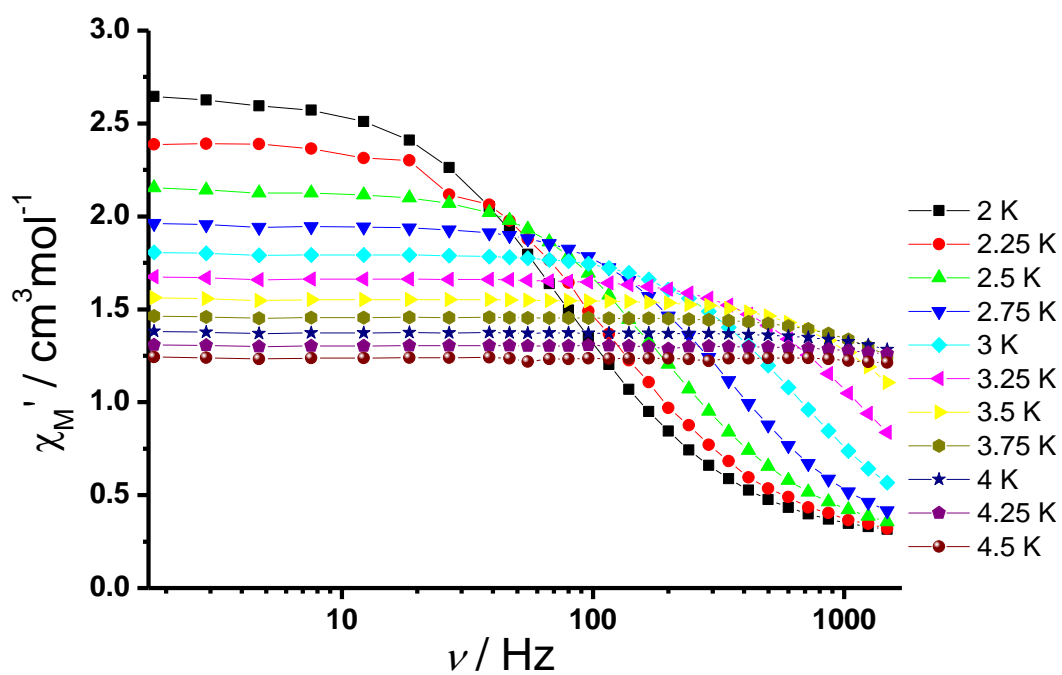

**Figure S8.** The in-phase  $\chi'_M$  components of the ac magnetic susceptibility for **1** under 1000 Oe dc field. The solid lines are guided for eyes.

Table S1. Selected bond lengths(Å) and bond angles( °) in complex **1**

---

|            |            |             |            |
|------------|------------|-------------|------------|
| Co1-O3     | 1.856(4)   | Co1-N11     | 1.860(4)   |
| Co1-N5     | 1.892(4)   | Co1-O4      | 1.899(3)   |
| Co1-O7     | 1.876(3)   | Co1-O8      | 1.917(4)   |
| Co2-O12    | 1.985(4)   | Co2-N6      | 2.033(4)   |
| Co2-N7     | 2.044(4)   | Co2-O14     | 2.065 (4)  |
| Co2-O4     | 2.354(3)   | Co3-N9      | 1.878(4)   |
| Co3-O1     | 1.885(4)   | Co3-N2      | 1.892(4)   |
| Co3-O6     | 1.886(3)   | Co3-O2      | 1.8947(16) |
| Co3-O5     | 1.914(3)   | Co4-O9      | 1.981(4)   |
| Co4-O10    | 2.007(2)   | Co4-N12     | 2.028(5)   |
| Co4-N3     | 2.032(4)   | O3-Co1-N11  | 88.53(9)   |
| O3-Co1-O7  | 93.38(8)   | N11-Co1-O7  | 83.27(9)   |
| O3-Co1-N5  | 83.14(9)   | N11-Co1-N5  | 169.68(9)  |
| O7-Co1-N5  | 91.12(9)   | O3-Co1-O4   | 178.11(9)  |
| N11-Co1-O4 | 92.72(9)   | O4-Co1-O7   | 88.18(8)   |
| N5-Co1-O4  | 95.76(9)   | O3-Co1-O8   | 89.64(9)   |
| N11-Co1-O8 | 94.84(10)  | O7-Co1-O8   | 176.39(7)  |
| N5-Co1-O8  | 91.21(9)   | O4-Co1-O8   | 88.84(8)   |
| O12-Co2-N6 | 97.78(9)   | O12-Co2-N7  | 111.17(9)  |
| N6-Co2-N7  | 138.69(10) | O12-Co2-O14 | 94.67(8)   |
| N6-Co2-O14 | 107.45(9)  | N7-Co2-O14  | 99.11(8)   |
| O12-Co2-O4 | 88.46(7)   | N6-Co2-O4   | 59.63(8)   |
| N7-Co2-O4  | 91.42(8)   | O14-Co2-O4  | 167.05(8)  |
| N9-Co3-O1  | 90.80(9)   | N9-Co3-N2   | 171.27(9)  |
| O1-Co3-N2  | 84.37(9)   | N9-Co3-O6   | 82.46(9)   |
| O1-Co3-O6  | 90.15(8)   | N2-Co3-O6   | 90.27(9)   |
| N9 Co3 O2  | 90.10(9)   | O1-Co3-O2   | 177.78(9)  |
| N2-Co3-O2  | 94.99(9)   | O6-Co3-O2   | 91.98(8)   |
| N9-Co3-O5  | 96.07(9)   | O1-Co3-O5   | 88.88(8)   |
| N2-Co3-O5  | 91.11(9)   | O6-Co3-O5   | 178.23(8)  |
| O2-Co3-O5  | 89.01(8)   | O9-Co4-O10  | 93.44(10)  |
| O9-Co4-N12 | 112.01(10) | O10-Co4-N12 | 95.54(10)  |
| O9-Co4-N3  | 100.73(11) | O10-Co4-N3  | 112.91(10) |
| N12-Co4-N3 | 135.00(11) |             |            |

---

Table S2. The total energy (in Hartree) and the cartesian coordinates for the optimised structure of the complex **1**.

HF=-8478.10516

|    |           |           |           |
|----|-----------|-----------|-----------|
| Co | 0.000000  | -0.000000 | -2.729199 |
| Co | -0.149746 | -2.875575 | -0.101214 |
| Co | 0.149746  | 2.875575  | -0.101214 |
| C  | -2.997926 | -0.530874 | 1.463494  |
| C  | -4.284356 | -0.889979 | 1.041079  |
| H  | -5.130815 | -0.306448 | 1.404123  |
| C  | -4.483626 | -1.947705 | 0.163186  |
| C  | -3.366064 | -2.637702 | -0.295089 |
| C  | -1.919239 | -1.316042 | 0.975086  |
| C  | 2.808628  | -0.584642 | 2.341622  |
| H  | 3.674855  | -1.175144 | 2.651836  |
| C  | 2.997926  | 0.530874  | 1.463494  |
| C  | 4.284356  | 0.889979  | 1.041079  |
| C  | 5.130815  | 0.306448  | 1.404123  |
| C  | 4.483626  | 1.947705  | 0.163186  |
| C  | 3.366064  | 2.637702  | -0.295089 |
| C  | 1.919239  | 1.316042  | 0.975086  |
| C  | 2.849814  | 0.275706  | -2.491388 |
| H  | 3.767899  | 0.782583  | -2.799969 |
| C  | 2.937290  | -0.885793 | -1.657319 |
| C  | 4.189104  | -1.388934 | -1.278750 |
| H  | 5.083200  | -0.891728 | -1.656270 |
| C  | 4.297579  | -2.479838 | -0.427270 |
| C  | 3.125111  | -3.063636 | 0.042617  |
| C  | 1.798008  | -1.563058 | -1.148912 |
| C  | -0.564538 | -2.062091 | -4.213946 |
| C  | -2.849814 | -0.275706 | -2.491388 |
| H  | -3.767899 | -0.782583 | -2.799969 |
| C  | -2.937290 | 0.885793  | -1.657319 |
| C  | -4.189104 | 1.388934  | -1.278750 |
| C  | -4.297579 | 2.479838  | -0.427270 |
| C  | -3.125111 | 3.063636  | 0.042617  |
| C  | -1.798008 | 1.563058  | -1.148912 |
| C  | -1.183008 | -4.487715 | 2.247831  |
| H  | -0.930167 | -5.148406 | 3.086356  |
| H  | -1.842231 | -5.025097 | 1.550600  |
| H  | -1.709419 | -3.610023 | 2.635924  |
| C  | 0.331302  | -5.540803 | -1.045793 |
| N  | -2.128829 | -2.328135 | 0.100142  |
| N  | 1.651294  | -0.931553 | 2.812852  |
| N  | 2.128829  | 2.328135  | 0.100142  |
| N  | 1.725971  | 0.772391  | -2.903317 |
| N  | 1.918574  | -2.615335 | -0.311135 |
| N  | -1.760275 | -1.898186 | -3.697004 |
| N  | -1.725971 | -0.772391 | -2.903317 |
| N  | -1.918574 | 2.615335  | -0.311135 |
| O  | -0.655656 | -1.177146 | 1.264905  |
| O  | 0.655656  | 1.177146  | 1.264905  |
| O  | -0.461125 | 1.307683  | -4.015869 |
| O  | 0.542894  | -1.265012 | -1.380028 |
| O  | 0.461125  | -1.307683 | -4.015869 |
| O  | -0.542894 | 1.265012  | -1.380028 |
| O  | 0.000000  | -4.031942 | 1.608964  |

|    |           |           |           |
|----|-----------|-----------|-----------|
| H  | 0.452459  | -4.821361 | 1.166472  |
| O  | 0.918290  | -5.870155 | 0.001411  |
| O  | -0.319509 | -4.463451 | -1.269964 |
| O  | -0.000000 | 4.031942  | 1.608964  |
| Co | -0.000000 | 0.000000  | 2.632395  |
| C  | -0.398127 | 2.045111  | 4.197728  |
| C  | -2.808628 | 0.584642  | 2.341622  |
| H  | -3.674855 | 1.175144  | 2.651836  |
| C  | 0.398127  | -2.045111 | 4.197728  |
| N  | -1.604047 | 1.993379  | 3.686726  |
| N  | -1.651294 | 0.931553  | 2.812852  |
| N  | 1.604047  | -1.993379 | 3.686726  |
| O  | 0.581058  | 1.248347  | 3.934017  |
| O  | -0.581058 | -1.248347 | 3.934017  |
| C  | 1.183008  | 4.487715  | 2.247831  |
| H  | 1.842231  | 5.025097  | 1.550600  |
| H  | 1.709419  | 3.610023  | 2.635924  |
| H  | 0.930167  | 5.148406  | 3.086356  |
| C  | 0.564538  | 2.062091  | -4.213946 |
| C  | -0.331302 | 5.540803  | -1.045793 |
| N  | 1.760275  | 1.898186  | -3.697004 |
| O  | -0.918290 | 5.870155  | 0.001411  |
| O  | 0.319509  | 4.463451  | -1.269964 |
| H  | -0.452459 | 4.821361  | 1.166472  |
| H  | -5.083200 | 0.891728  | -1.656270 |
| H  | -0.432200 | -2.912268 | -4.886810 |
| H  | -3.131428 | 3.918766  | 0.717283  |
| H  | -5.265610 | 2.874959  | -0.132675 |
| H  | -0.340474 | 6.252052  | -1.896999 |
| H  | 0.340474  | -6.252052 | -1.896999 |
| H  | -5.479564 | -2.229937 | -0.166422 |
| H  | -3.438468 | -3.457849 | -1.009098 |
| H  | -0.208801 | 2.839052  | 4.924894  |
| H  | 0.208801  | -2.839052 | 4.924894  |
| H  | 0.432200  | 2.912268  | -4.886810 |
| H  | 5.479564  | 2.229937  | -0.166422 |
| H  | 3.438468  | 3.457849  | -1.009098 |
| H  | 5.265610  | -2.874959 | -0.132675 |
| H  | 3.131428  | -3.918766 | 0.717283  |

Table S3. The Mulliken charge and spin for the optimised structure of the complex **1**.

|    |    | Charge    | SPIN      |
|----|----|-----------|-----------|
| 1  | Co | 1.186789  | 0.020614  |
| 2  | Co | 1.128336  | 2.807811  |
| 3  | Co | 1.128336  | 2.807811  |
| 4  | C  | 0.041890  | 0.001626  |
| 5  | C  | -0.169325 | -0.017909 |
| 6  | H  | 0.184066  | 0.001287  |
| 7  | C  | -0.253163 | 0.010145  |
| 8  | C  | 0.041428  | -0.019574 |
| 9  | C  | 0.665470  | -0.005490 |
| 10 | C  | 0.041061  | 0.001522  |
| 11 | H  | 0.194109  | 0.000045  |
| 12 | C  | 0.041890  | 0.001626  |
| 13 | C  | -0.169325 | -0.017909 |
| 14 | H  | 0.184066  | 0.001287  |
| 15 | C  | -0.253163 | 0.010145  |
| 16 | C  | 0.041428  | -0.019574 |
| 17 | C  | 0.665470  | -0.005490 |
| 18 | C  | 0.044365  | 0.001912  |
| 19 | H  | 0.191301  | -0.000055 |
| 20 | C  | 0.043118  | 0.000215  |
| 21 | C  | -0.168234 | -0.013596 |
| 22 | H  | 0.182463  | 0.001012  |
| 23 | C  | -0.253795 | 0.008178  |
| 24 | C  | 0.051039  | -0.014913 |
| 25 | C  | 0.688231  | -0.001001 |
| 26 | C  | 0.328463  | -0.000501 |
| 27 | C  | 0.044365  | 0.001912  |
| 28 | H  | 0.191301  | -0.000055 |
| 29 | C  | 0.043118  | 0.000215  |
| 30 | C  | -0.168234 | -0.013596 |
| 31 | C  | -0.253795 | 0.008178  |
| 32 | C  | 0.051039  | -0.014913 |
| 33 | C  | 0.688231  | -0.001001 |
| 34 | C  | -0.254297 | -0.001799 |
| 35 | H  | 0.181868  | 0.002348  |
| 36 | H  | 0.179082  | 0.002038  |
| 37 | H  | 0.183269  | 0.001051  |
| 38 | C  | 0.438049  | -0.005048 |
| 39 | N  | -0.633062 | 0.026139  |
| 40 | N  | -0.373347 | -0.001159 |
| 41 | N  | -0.633062 | 0.026139  |
| 42 | N  | -0.376379 | -0.001615 |
| 43 | N  | -0.626247 | 0.023888  |
| 44 | N  | -0.287770 | 0.000128  |
| 45 | N  | -0.376379 | -0.001615 |
| 46 | N  | -0.626247 | 0.023888  |
| 47 | O  | -0.717678 | 0.014173  |
| 48 | O  | -0.717678 | 0.014173  |
| 49 | O  | -0.539887 | 0.002420  |
| 50 | O  | -0.739657 | 0.016082  |
| 51 | O  | -0.539887 | 0.002420  |
| 52 | O  | -0.739657 | 0.016082  |
| 53 | O  | -0.726391 | 0.049892  |
| 54 | H  | 0.512353  | -0.000782 |

|    |    |           |           |
|----|----|-----------|-----------|
| 55 | O  | -0.557265 | 0.006164  |
| 56 | O  | -0.589508 | 0.071970  |
| 57 | O  | -0.726391 | 0.049892  |
| 58 | Co | 1.183994  | 0.016567  |
| 59 | C  | 0.322752  | -0.000418 |
| 60 | C  | 0.041061  | 0.001522  |
| 61 | H  | 0.194109  | 0.000045  |
| 62 | C  | 0.322752  | -0.000418 |
| 63 | N  | -0.275312 | 0.000280  |
| 64 | N  | -0.373347 | -0.001159 |
| 65 | N  | -0.275312 | 0.000280  |
| 66 | O  | -0.545834 | 0.002181  |
| 67 | O  | -0.545834 | 0.002181  |
| 68 | C  | -0.254297 | -0.001799 |
| 69 | H  | 0.179082  | 0.002038  |
| 70 | H  | 0.183269  | 0.001051  |
| 71 | H  | 0.181868  | 0.002348  |
| 72 | C  | 0.328463  | -0.000501 |
| 73 | C  | 0.438049  | -0.005048 |
| 74 | N  | -0.287770 | 0.000128  |
| 75 | O  | -0.557265 | 0.006164  |
| 76 | O  | -0.589508 | 0.071970  |
| 77 | H  | 0.512353  | -0.000782 |
| 78 | H  | 0.182463  | 0.001012  |
| 79 | H  | 0.180773  | 0.000057  |
| 80 | H  | 0.205642  | 0.002261  |
| 81 | H  | 0.192922  | 0.000345  |
| 82 | H  | 0.109431  | 0.006688  |
| 83 | H  | 0.109431  | 0.006688  |
| 84 | H  | 0.192220  | 0.000342  |
| 85 | H  | 0.206999  | 0.002972  |
| 86 | H  | 0.171058  | 0.000100  |
| 87 | H  | 0.171058  | 0.000100  |
| 88 | H  | 0.180773  | 0.000057  |
| 89 | H  | 0.192220  | 0.000342  |
| 90 | H  | 0.206999  | 0.002972  |
| 91 | H  | 0.192922  | 0.000345  |
| 92 | H  | 0.205642  | 0.002261  |

Table S4. The parameters of  $\chi_T$ ,  $\chi_S$ ,  $\tau$ , and  $\alpha$  used in the analyses by Debye model for complex **1** under the different fields at 2 K.

|                | $\chi_T$ | $\chi_S$ | $\alpha$ | $\tau$ (s) |
|----------------|----------|----------|----------|------------|
| <b>200 Oe</b>  | 1.59     | 0.91     | 0.09     | 0.00046    |
| <b>500 Oe</b>  | 2.52     | 0.47     | 0.15     | 0.00117    |
| <b>1000 Oe</b> | 2.72     | 0.28     | 0.16     | 0.00190    |
| <b>1500 Oe</b> | 2.74     | 0.26     | 0.17     | 0.00221    |
| <b>2000 Oe</b> | 2.72     | 0.28     | 0.18     | 0.00226    |

Table S5. The parameters of  $\chi_T$ ,  $\chi_S$ ,  $\tau$ , and  $\alpha$  used in the analyses by Debye model for complex **1** under 1000 Oe field.

|               | $\chi_T$ | $\chi_S$ | $\alpha$ | $\tau$  |
|---------------|----------|----------|----------|---------|
| <b>2.0 K</b>  | 2.75     | 0.38     | 0.19     | 0.00189 |
| <b>2.25 K</b> | 2.48     | 0.35     | 0.19     | 0.00129 |
| <b>2.5 K</b>  | 2.15     | 0.33     | 0.12     | 0.00079 |
| <b>2.75 K</b> | 1.93     | 0.31     | 0.06     | 0.00045 |
| <b>3.0 K</b>  | 1.78     | 0.31     | 0.04     | 0.00024 |
| <b>3.25 K</b> | 1.66     | 0.38     | 0.04     | 0.00014 |
| <b>3.5 K</b>  | 1.54     | 0.31     | 0.04     | 0.00008 |
| <b>3.75 K</b> | 1.45     | 0.46     | 0.002    |         |
| <b>4.0 K</b>  | 1.37     | 0.53     | 0.005    |         |

Equation S1.

$$\chi''(\chi') = -\frac{\chi_T - \chi_S}{2\tan[1/2\pi(1 - \alpha)]} \left\{ \left[ \frac{\chi_T - \chi_S}{2} \right]^2 - \left[ \frac{\chi_T - \chi_S}{2\tan[1/2\pi(1 - \alpha)]} \right]^2 - \left[ \chi' - \frac{\chi_T + \chi_S}{2} \right]^2 \right\}^{1/2}$$
